# Supplementary material for: Interplanting of Corn (Zea mays L.) Shifts Nitrogen Utilization by Promoting Rhizosphere Microbial Nitrogen Nitrification
Source: MDPI journal article supplement (doi:10.3390/agronomy14030586), 2024-03-14
Supplement: s1 [file s1]

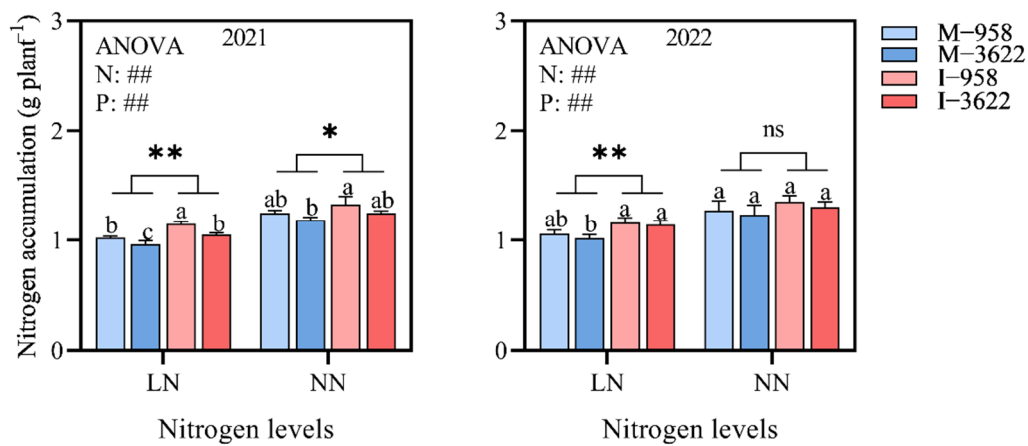

**Figure S1.** Nitrogen accumulation of two corn cultivars under different nitrogen levels (N) and planting pattern (P) in 2021 and 2022. Based on one-way ANOVA, different lower-case letters indicated a significant difference of two planting patterns and two corn cultivars under same N level. Based on two-way ANOVA considering the factors of “planting pattern” (2 levels) and “cultivar” (2 levels), \*\*,  $P < 0.01$ ; \*,  $P < 0.05$ ; and ns,  $P > 0.05$  indicated differences between interplanting (I) and monocropping (M) under same N level. Based on three-way ANOVA considering the factors of “N application” (2 levels) “planting pattern” (2 levels) and “cultivar” (2 levels), ###,  $P < 0.01$  indicated their effects.

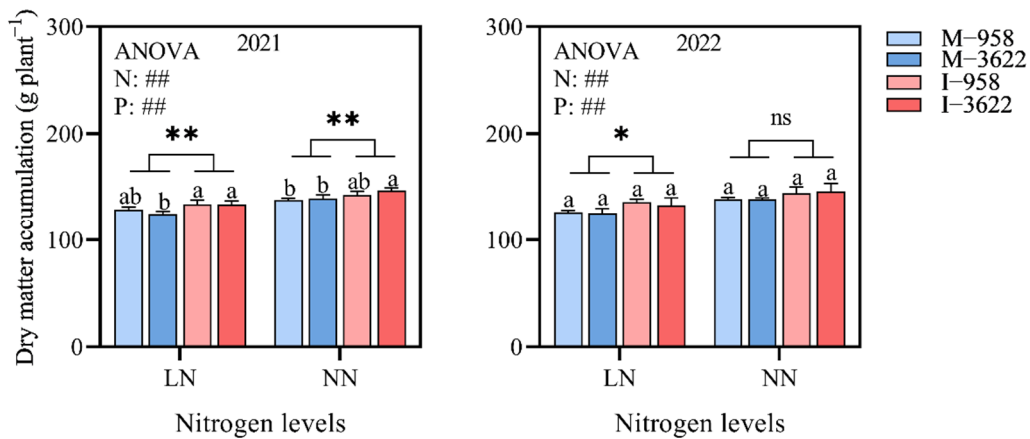

**Figure S2.** Dry matter accumulation of two corn cultivars under different nitrogen levels (N) and planting pattern (P) in 2021 and 2022. Based on one-way ANOVA, different lower-case letters indicated a significant difference of two planting patterns and two corn cultivars under same N level. Based on two-way ANOVA considering the factors of “planting pattern” (2 levels) and “cultivar” (2 levels), \*\*,  $P < 0.01$ ; \*,  $P < 0.05$ ; and ns,  $P > 0.05$  indicated differences between interplanting (I) and monocropping (M) under same N level. Based on three-way ANOVA considering the factors of “N application” (2 levels) “planting pattern” (2 levels) and “cultivar” (2 levels), ###,  $P < 0.01$  indicated their effects.

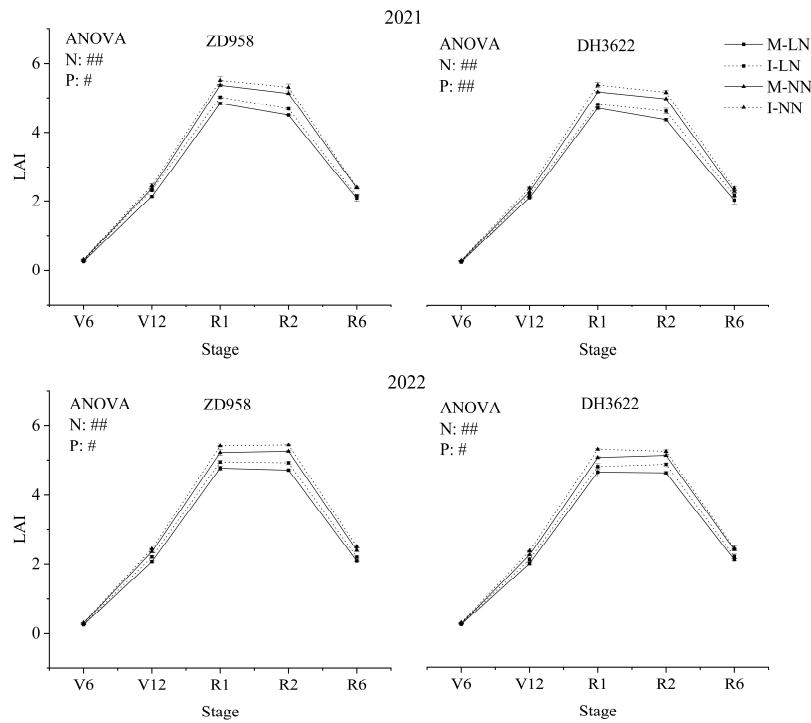

**Figure S3.** Leaf area index of two corn cultivars under different nitrogen levels (N) and planting pattern (P) in 2021 and 2022. Based on three-way ANOVA considering the factors of “N application” (2 levels) “planting pattern” (2 levels) and “cultivar” (2 levels), ##,  $P < 0.01$ ; #,  $P < 0.05$  indicated their effects. Interplanting (I) and monocropping (M)

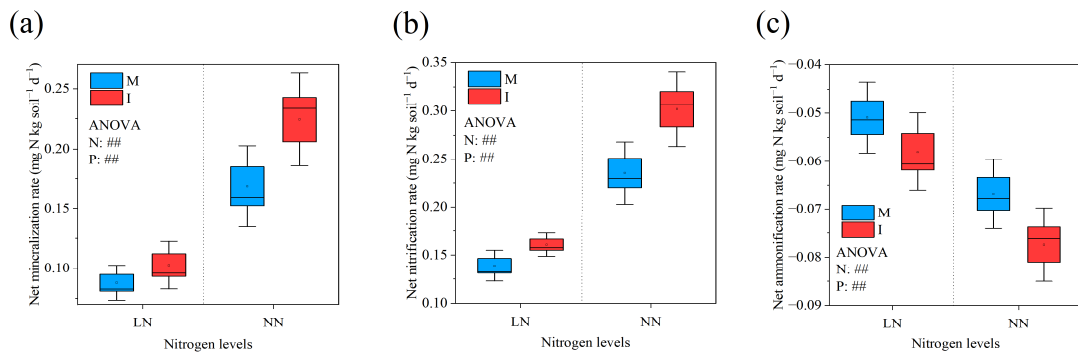

**Figure S4.** Net potential mineralization rate (a), net potential nitrification rate (b), net potential ammonification rate (c) and  $N_2O$  flux (d) of two corn cultivars under different nitrogen levels (N) and planting patterns (P) in 2022. Based on three-way ANOVA considering the factors of “N application” (2 levels) “planting pattern” (2 levels) and “cultivar” (2 levels), ##,  $P < 0.01$  indicated their effects. Interplanting, (I); monocropping, (M).

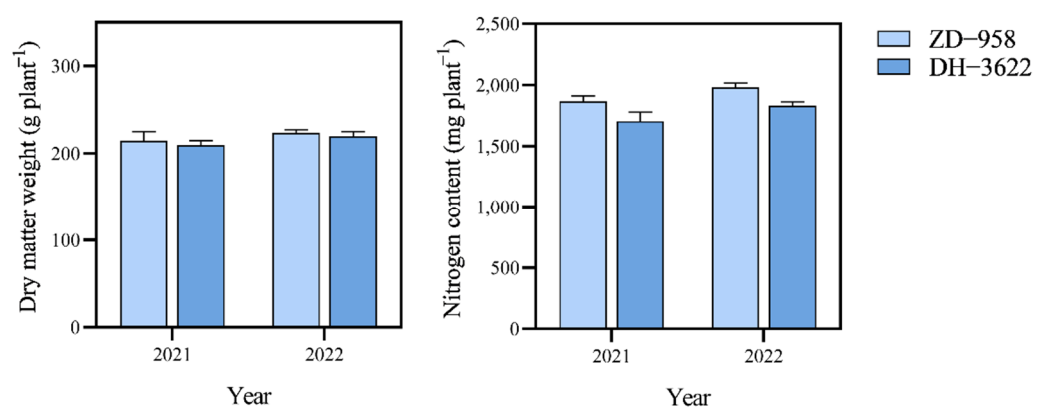

**Figure S5.** Dry matter weight at maturity and nitrogen content at maturity of two corn cultivars with blank treatment in 2021 and 2022.
